# Supplementary material
Source: PubMed Central journal article supplement (PMC8223120)
Supplement: NIHMS1699070-supplement-1.pdf [file NIHMS1699070-supplement-1.pdf]

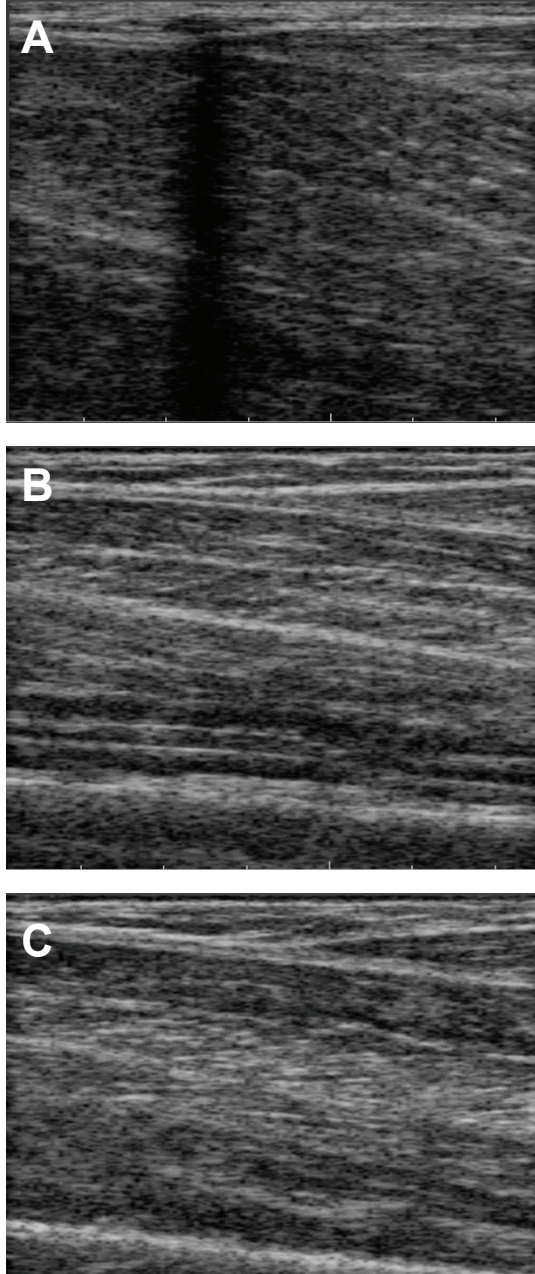

Supplemental Figure 1. Examples of image characteristics that produced poor tracking results. A) acoustic shadow, B) aponeuroses do not converge, C) more than one 'Y' shape on superficial aponeurosis
